# Supplementary material
Source: ML conference proceedings conference paper supplement (https://openreview.net/forum?id=MOKqzGdjmF)
Supplement: supplementary_material [file attachment]

# Supplementary Materials: Visual Question Answering Driven Eye Tracking Paradigm for Identifying Children with Autism Spectrum Disorder

Anonymous Authors

In this supplementary material, we provide more examples of the images and the corresponding gaze patterns in our Visual Question Answering (VQA) driven eye-tracking dataset VQA4ASD, including VA (the abstract scenes in VQA4ASD) and VR (the real scenes in VQA4ASD). In each figure, the left column is the original image, the middle two columns are the gaze patterns of the control subjects, the right two columns are the gaze patterns of the subjects with Autism Spectrum Disorder (ASD), and the corresponding question is given below the image.

## A MORE EXAMPLES IN VR

The examples of the images and the corresponding gaze patterns in VR are shown in Fig. 1, Fig. 2, and Fig. 3. We can see that the gaze patterns of the control group are more similar and relevant to the questions than those of ASD, showing that VQA task can provide useful guidance to reduce the intra-variance than Image-viewing task.

## B MORE EXAMPLES IN VA

The examples of the images and the corresponding gaze patterns in VA are shown in Fig. 4 and Fig. 5. We can see that the gaze patterns of the control group present higher similarities and are also much related to the questions. In contrast, the gaze patterns of ASD children are distributed to some question-irrelevant regions.

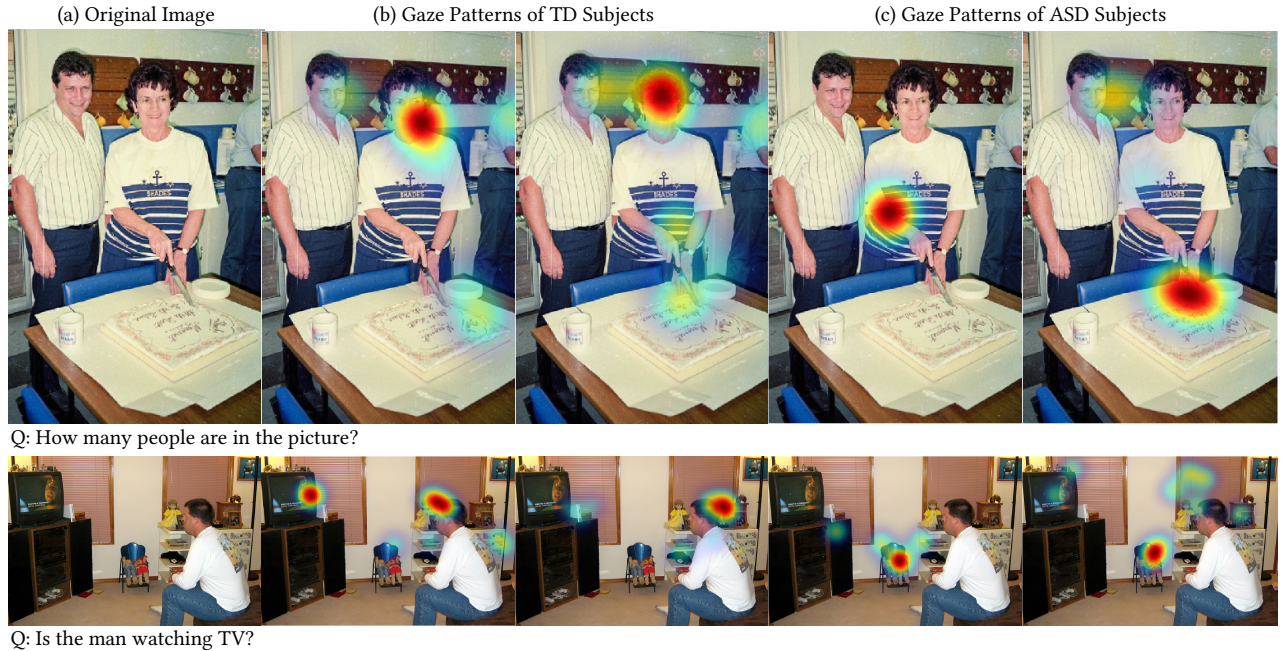

Figure 1: The examples of images and corresponding gaze patterns in VR.



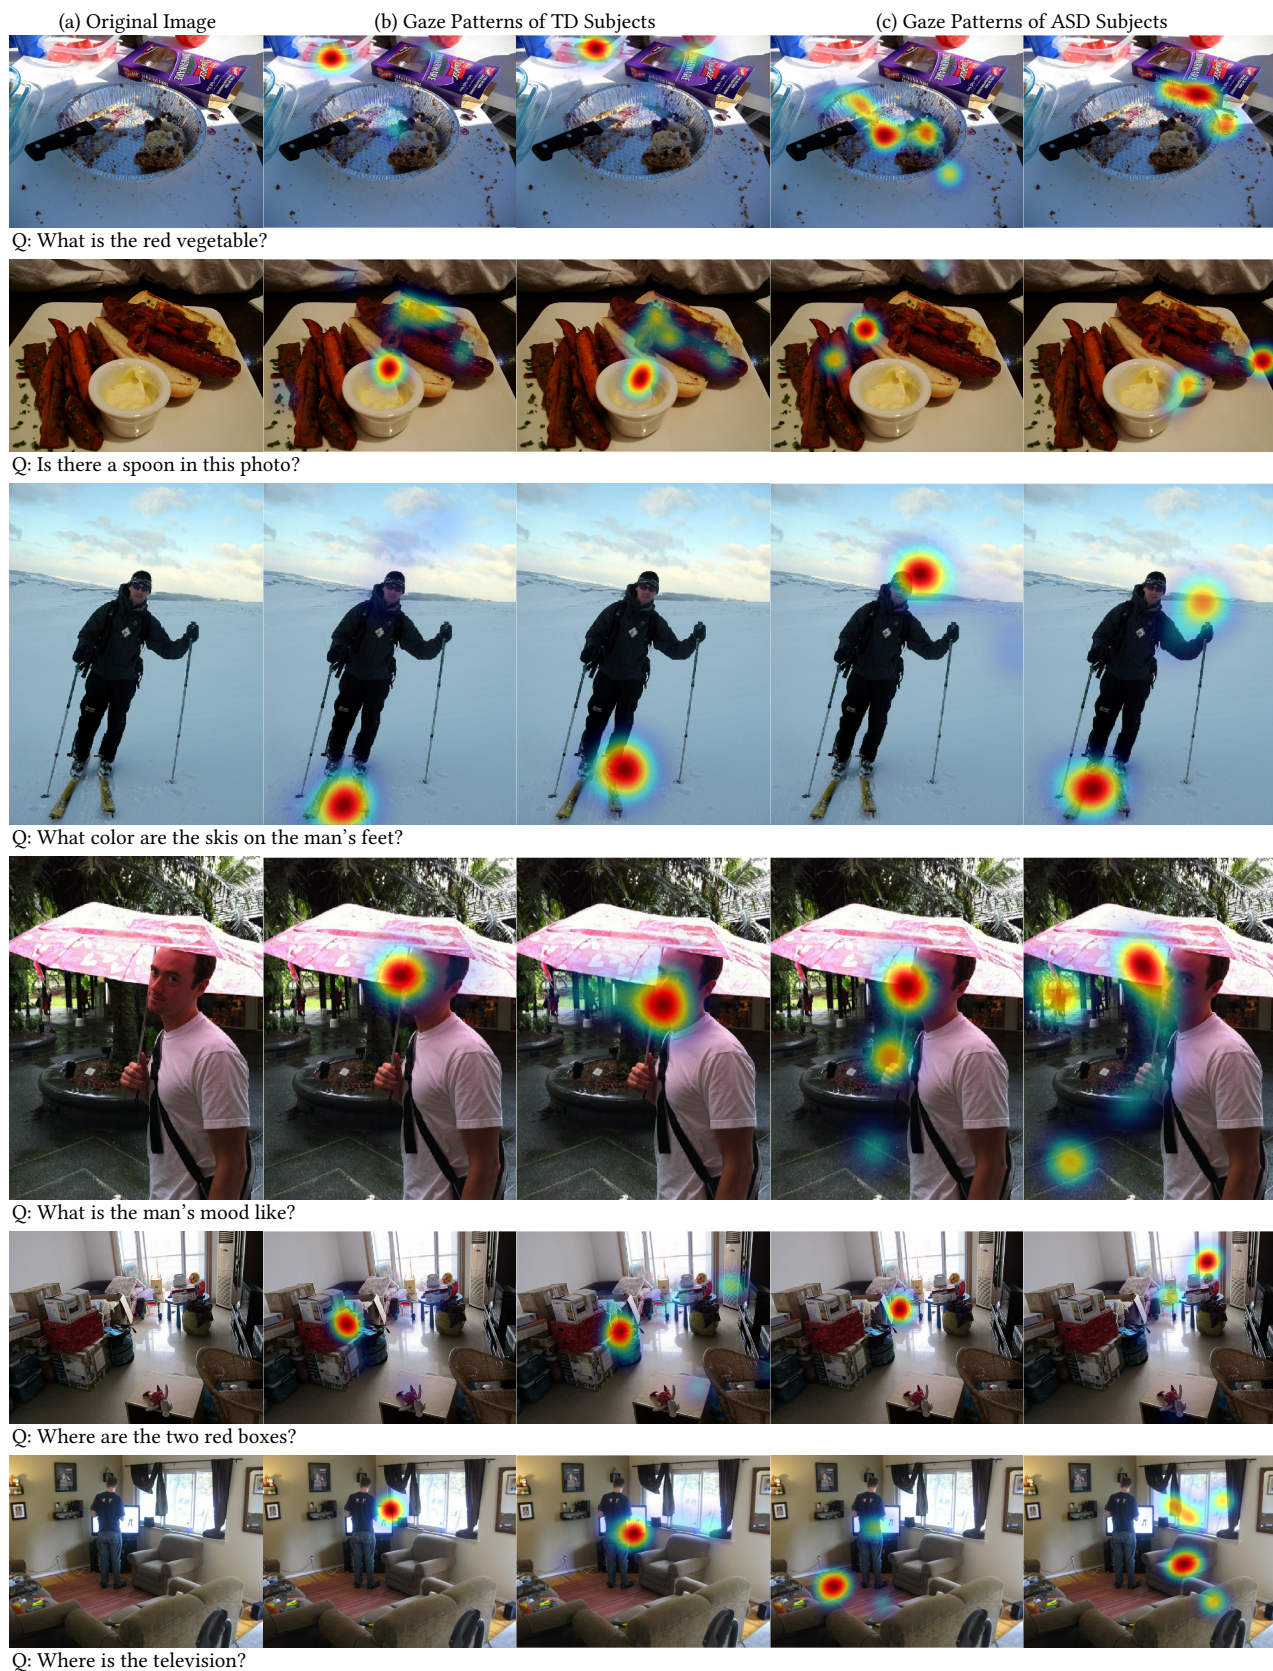

Figure 2: The examples of images and corresponding gaze patterns in VR.



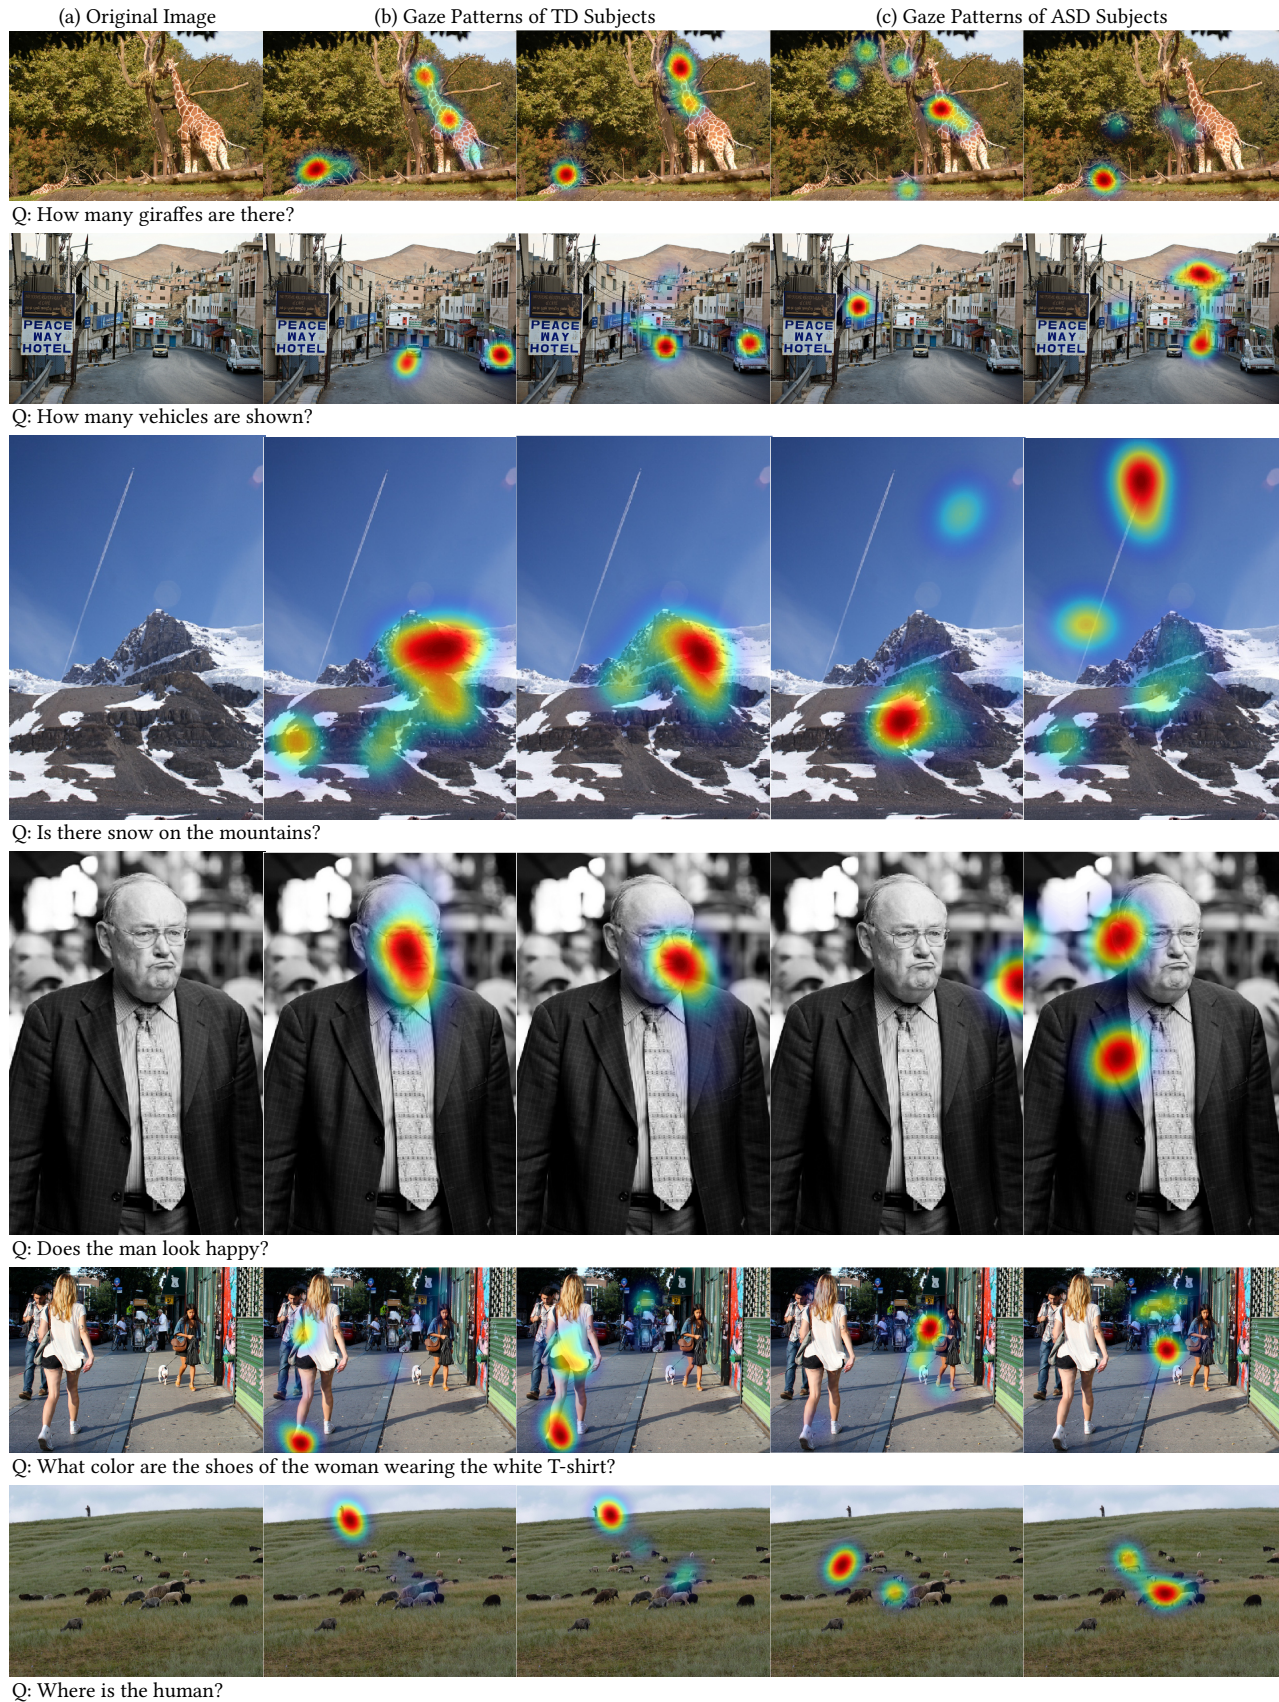

Figure 3: The examples of images and corresponding gaze patterns in VR.



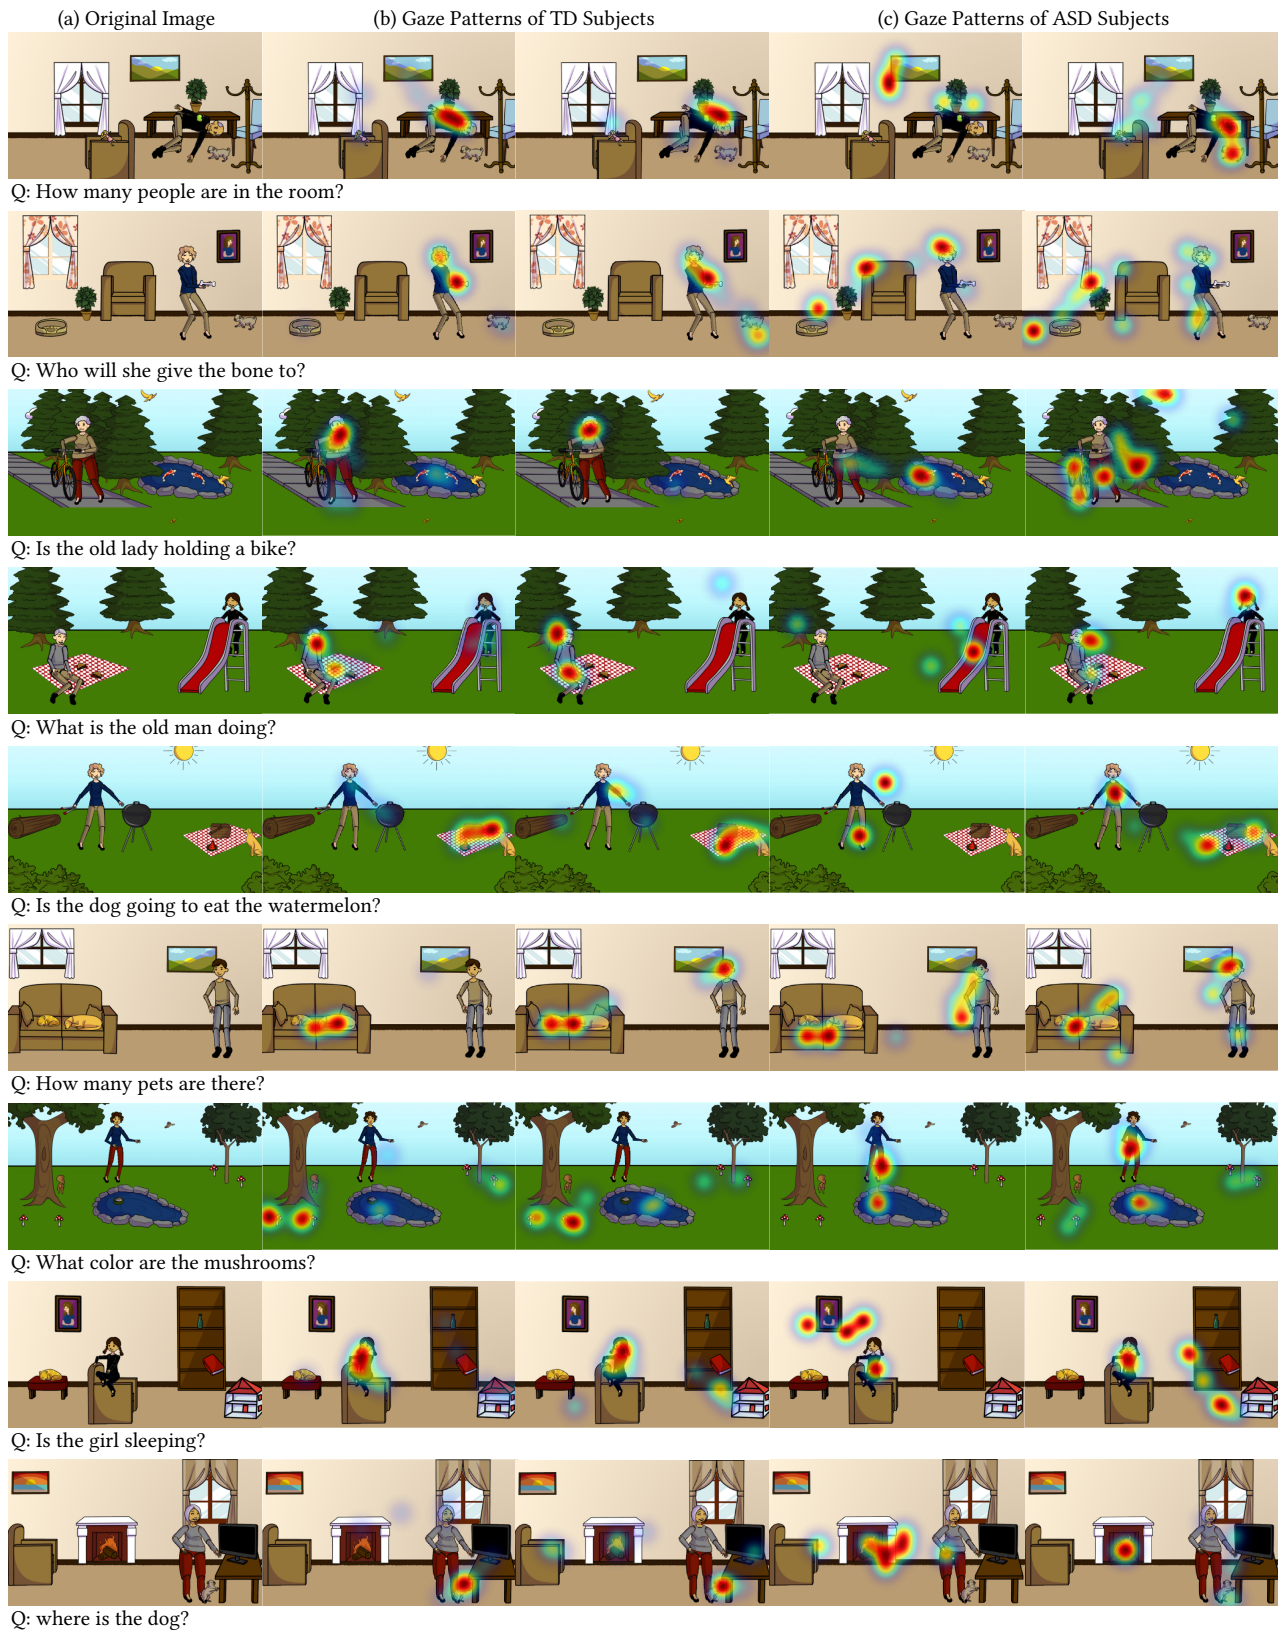

Figure 4: The examples of images and corresponding gaze patterns in VA.



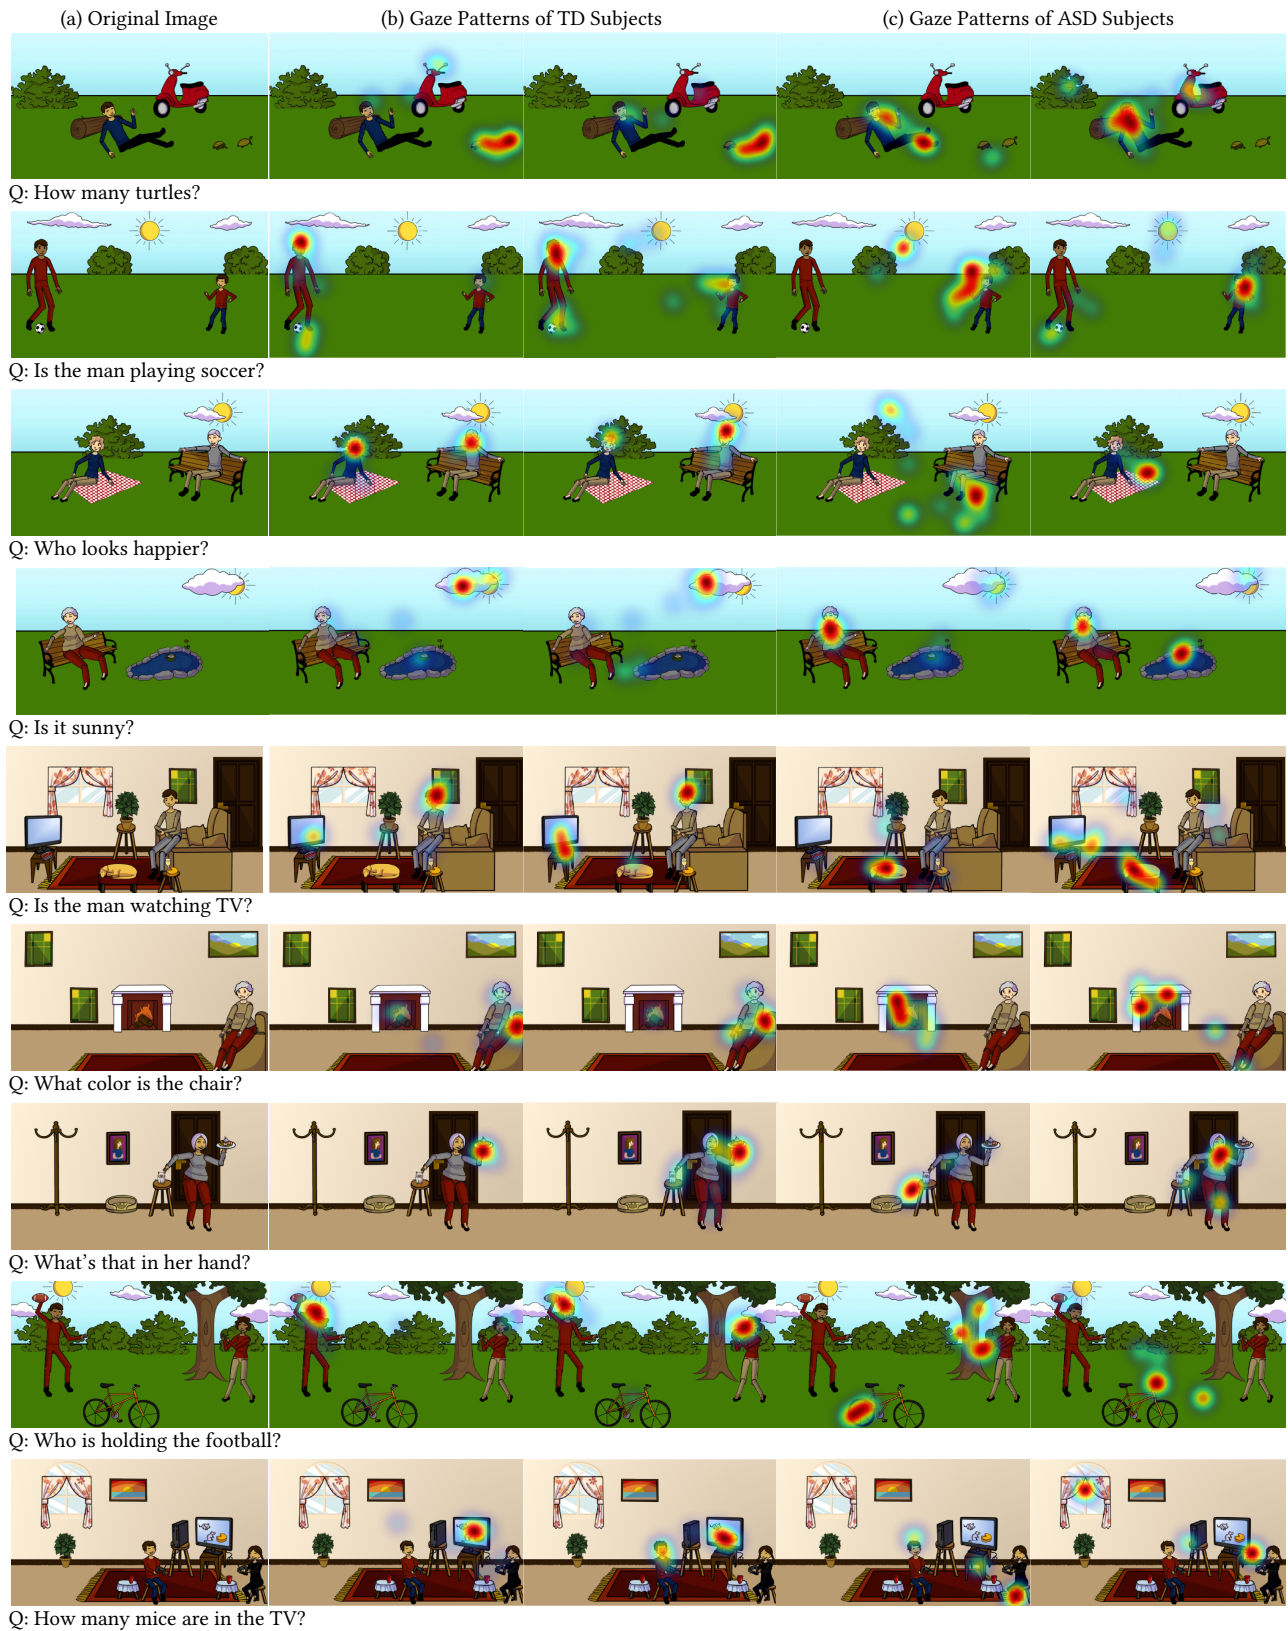

Figure 5: The examples of images and corresponding gaze patterns in VA.
